# Supplementary figures and images for: Peer-Led Diabetes Education Programs in High-Risk Mexican Americans Improve Glycemic Control Compared With Standard Approaches: A Project Dulce promotora randomized trial
Source: PubMed Central journal article supplement — Diabetes Care. 2011 Aug 19;34(9):1926–31. doi: 10.2337/dc10-2081 (PMC3161298; doi:10.2337/dc10-2081), 2011-08-19

SUPPLEMENTARY DATA

Supplementary Figure 1.

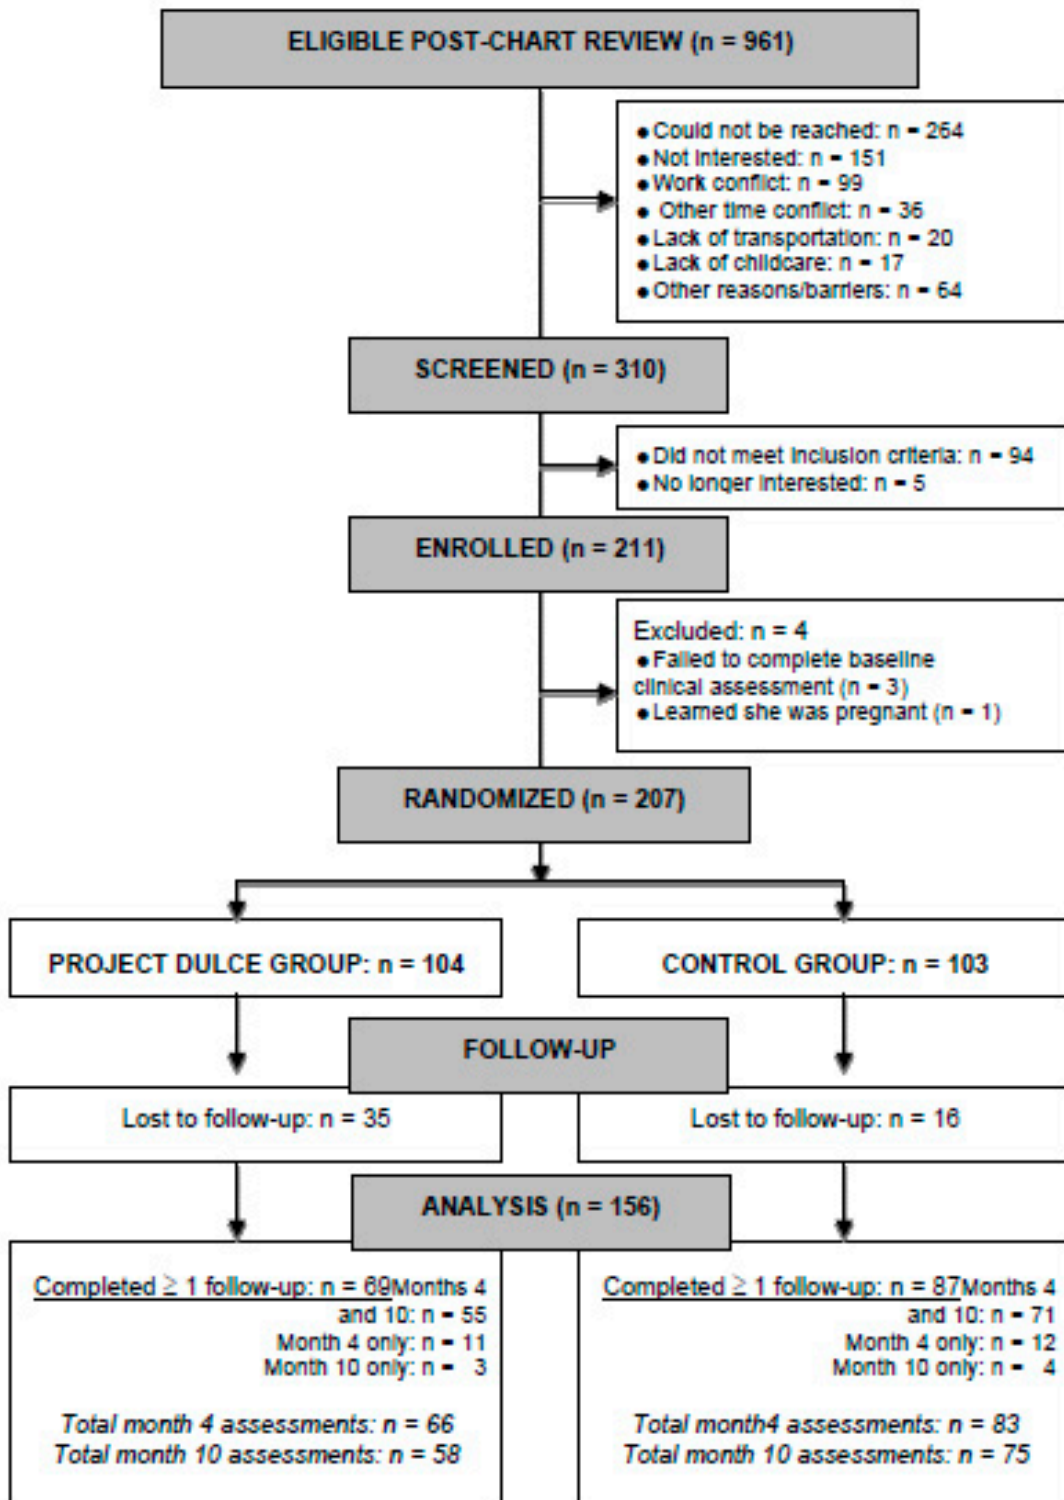

Supplement: supp_dc10-2081v102081_DC102081SupplementaryData.pdf [file supp_dc10-2081v102081_DC102081SupplementaryData.pdf]
